# Supplementary material for: Characterization of Antibacterial Strains against Kiwifruit Bacterial Canker Pathogen
Source: PubMed Central journal article supplement — Plant Pathol J. 2019 Oct 1;35(5):473–85. doi: 10.5423/PPJ.OA.05.2019.0154 (PMC6788412; doi:10.5423/ppj.oa.05.2019.0154), 2019-10-01
Supplement: PPJ-35-473_Supple.pdf [file PPJ-35-473_Supple.pdf]

**Supplementary Table 1.** Primers for amplification and sequencing using housekeeping genes (*atpD/recA*)

| Gene        | Usage of primer                      | Primer name and sequences (5'-3')                       | Position                                          | Amplicon size (bp) | Annealing temperature (°C) |    |
|-------------|--------------------------------------|---------------------------------------------------------|---------------------------------------------------|--------------------|----------------------------|----|
| <i>atpD</i> | Amplification                        | <i>atpDPF</i><br>GTCGGCGACTTCACCAAGGGCAAGGTGTTCAACACC   | 283-318                                           | 998                | 63                         |    |
|             |                                      | <i>atpDPR</i><br>GTGAACTGCTTGGCGACGTGGGTGTTCTGGGACAGGAA | 1,243-1,280                                       |                    |                            |    |
|             | Sequencing                           | <i>atpDF</i><br>ACCAAGGGCAAGGTGTTCAA                    | 295-314                                           | -                  | -                          |    |
|             |                                      | <i>atpDR</i><br>GCCGGGTAGATGCCCTTCTC                    | 1,027-1,046                                       |                    |                            |    |
|             |                                      | Amplification                                           | <i>recAPF</i><br>CCGCRCTCGCACAGATTGAACGSCAATTC    | 35-63              | 913                        | 60 |
|             |                                      |                                                         | <i>recAPR</i><br>GCSAGGTCGGGGTTGTCCTTSAGGAAGTTGCG | 916-947            |                            |    |
| Sequencing  | <i>recAF</i><br>ACAGATTGAACGGCAATTCG | 45-64                                                   | -                                                 | -                  |                            |    |
|             | <i>recAR</i><br>ACCTGTTCTTGACCACCTT  | 733-752                                                 |                                                   |                    |                            |    |

**Supplementary Table 2.** Microbes isolation and selection of anti-Psa strains from rhizosphere soil, sap and pollen of kiwifruit

|                   | Rhizosphere | Sap | Pollen |
|-------------------|-------------|-----|--------|
| Isolated microbes | 1,175       | 768 | 1,080  |
| 1st screening     | 56          | 156 | 106    |
| 2nd screening     | 15          | 35  | 2      |
| 3rd screening     | 9           | 0   | 2      |

Psa, *Pseudomonas syringae* pv. *actinidiae*.

**Supplementary Table 3.** GenBank accession numbers for genome sequencing

| Bacteria strain                               |            | SRA       | BioProject  | Biosample    | Genome     |
|-----------------------------------------------|------------|-----------|-------------|--------------|------------|
| <i>Streptomyces racemochromogenes</i> . W1SF4 | Chromosome | SRP172801 | PRJNA487679 | SAMN09908039 | CP34350.0  |
|                                               | Plasmid 1  | SRP172801 | PRJNA487679 | SAMN09908039 | CP034351.1 |
|                                               | Plasmid 2  | SRP172801 | PRJNA487679 | SAMN09908039 | CP034352.1 |
| <i>Streptomyces parvulus</i> KPB2             | Chromosome | SRP172808 | PRJNA487680 | SAMN09908040 | CP034353.1 |

**Supplementary Table 4.** Gene ontology analysis in *Streptomyces* sp. W1SF4 by EggNOG

| Eggnog | Description                                                   | Count | Ratio (%) |
|--------|---------------------------------------------------------------|-------|-----------|
| A      | RNA processing and modification                               | 1     | 0.0139    |
| B      | Chromatin structure and dynamics                              | 1     | 0.0139    |
| C      | Energy production and conversion                              | 319   | 4.423     |
| D      | Cell cycle control, cell division, chromosome partitioning    | 34    | 0.4735    |
| E      | Amino acid transport and metabolism                           | 405   | 5.6399    |
| F      | Nucleotide transport and metabolism                           | 96    | 1.3369    |
| G      | Carbohydrate transport and metabolism                         | 317   | 4.4144    |
| H      | Coenzyme transport and metabolism                             | 149   | 2.0749    |
| I      | Lipid transport and metabolism                                | 206   | 2.8687    |
| J      | Translation, ribosomal structure and biogenesis               | 187   | 2.6041    |
| K      | Transcription                                                 | 557   | 7.7566    |
| L      | Replication, recombination and repair                         | 180   | 2.5066    |
| M      | Cell wall/membrane/envelope biogenesis                        | 202   | 2.813     |
| N      | Cell motility                                                 | 1     | 0.0139    |
| O      | Posttranslational modification, protein turnover, chaperones  | 158   | 2.2003    |
| P      | Inorganic ion transport and metabolism                        | 261   | 3.6346    |
| Q      | Secondary metabolites biosynthesis, transport and catabolism  | 165   | 2.2977    |
| R      | General function prediction only                              | 1318  | 18.354    |
| S      | Function unknown                                              | 2141  | 29.8148   |
| T      | Signal transduction mechanisms                                | 328   | 4.5676    |
| U      | Intracellular trafficking, secretion, and vesicular transport | 34    | 0.4735    |
| V      | Defense mechanisms                                            | 119   | 1.6572    |
| Z      | Cytoskeleton                                                  | 2     | 0.0279    |
| Total  | -                                                             | 7181  | 100       |

**Supplementary Table 5.** Gene assigned of ontology in *Streptomyces* sp. KPB2 with EggNOG

| Eggnog | Description                                                   | Count | Ratio (%) |
|--------|---------------------------------------------------------------|-------|-----------|
| A      | RNA processing and modification                               | 1     | 0.0141    |
| B      | Chromatin structure and dynamics                              | 1     | 0.0141    |
| C      | Energy production and conversion                              | 330   | 4.6499    |
| D      | Cell cycle control, cell division, chromosome partitioning    | 26    | 0.3664    |
| E      | Amino acid transport and metabolism                           | 406   | 5.7207    |
| F      | Nucleotide transport and metabolism                           | 99    | 1.395     |
| G      | Carbohydrate transport and metabolism                         | 464   | 6.538     |
| H      | Coenzyme transport and metabolism                             | 151   | 2.1277    |
| I      | Lipid transport and metabolism                                | 170   | 2.3954    |
| J      | Translation, ribosomal structure and biogenesis               | 194   | 2.7335    |
| K      | Transcription                                                 | 598   | 8.4261    |
| L      | Replication, recombination and repair                         | 207   | 2.9167    |
| M      | Cell wall/membrane/envelope biogenesis                        | 226   | 3.1844    |
| O      | Posttranslational modification, protein turnover, chaperones  | 141   | 1.9868    |
| P      | Inorganic ion transport and metabolism                        | 293   | 4.1285    |
| Q      | Secondary metabolites biosynthesis, transport and catabolism  | 159   | 2.2404    |
| R      | General function prediction only                              | 1147  | 16.1618   |
| S      | Function unknown                                              | 2006  | 28.2655   |
| T      | Signal transduction mechanisms                                | 317   | 4.4667    |
| U      | Intracellular trafficking, secretion, and vesicular transport | 31    | 0.4368    |
| V      | Defense mechanisms                                            | 130   | 1.8318    |
| Total  | -                                                             | 7097  | 100       |

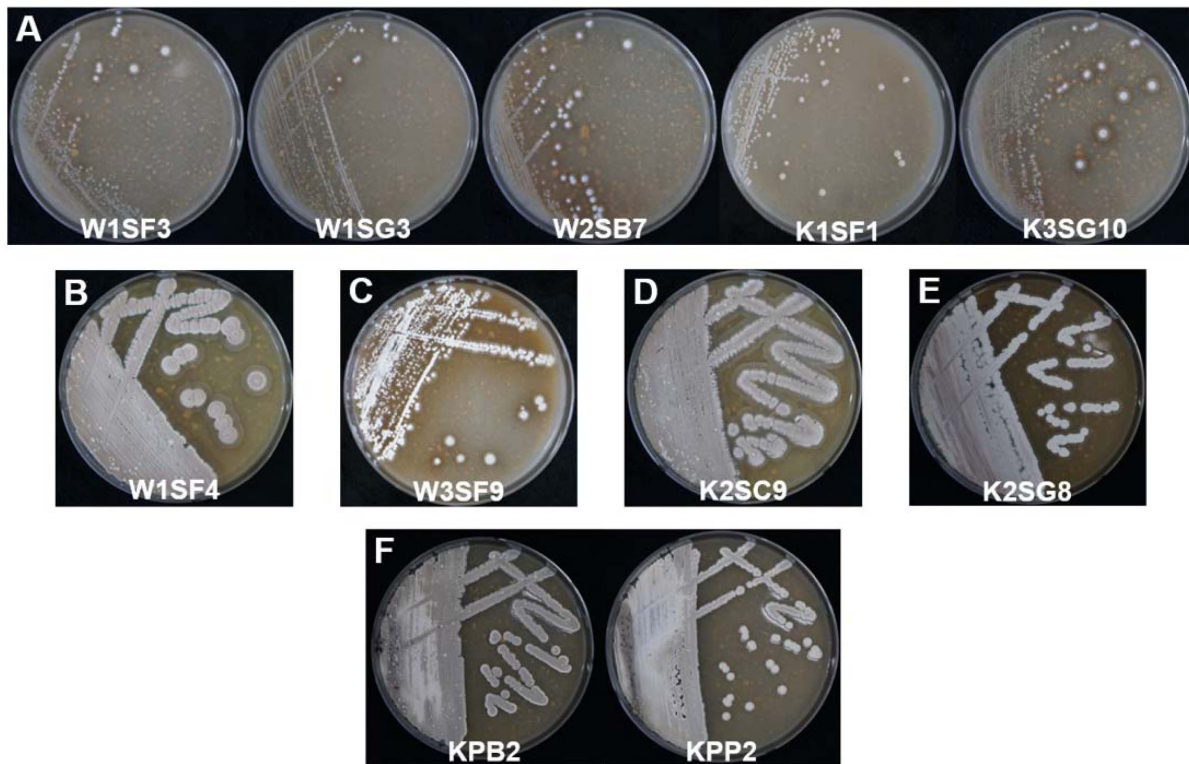

**Supplementary Fig. 1.** Phenotypes of selected anti-*Pseudomonas syringae* pv. *actinidiae* (Psa) strains on mannitol-soya (MS) agar. Selected 11 anti-Psa strains were cultured to sporulation fully on MS media at 30°C for 5 days. The phenotypic characteristics on MS are distinguished as 6 types according to colony color, shape or color change around the colony. The A types produce powdery and poor sporulating white colony with ocher halo (A), the B type produces powdery and abundant light pink colony (B), the C type produces powdery and rough surfaced white colony with brown halo (C), and the D type produces powdery and flat light pink colony (D). The E type produces powdery and smooth pink colony (E) and the F types produce powdery and smooth dusky pink colony (F). The A types are grouped with W1SF3, W1SG3, W2SB7, K1SF1 and K3SG10. The B, C, D and E type are grouped with W1SF4, W3SF9, K2SC9 and K2SG8 individually. The F types are grouped with KPB2 and KPP2.
